# Supplementary material for: Solventless Photopolymerizable Paper Coating Formulation for Packaging Applications
Source: MDPI journal article supplement (doi:10.3390/polym15051069), 2023-02-21
Supplement: s1 [file s1]

## Supplementary Information

# Solventless Photopolymerizable Paper Coating Formulation for Packaging Applications

Fábio M. Silva, Ricardo J. B. Pinto, Ana Barros-Timmons and Carmen S. R. Freire \*

CICECO—Aveiro Institute of Materials, Chemistry Department, University of Aveiro,  
3810-193 Aveiro, Portugal

\* Correspondence: cfreire@ua.pt

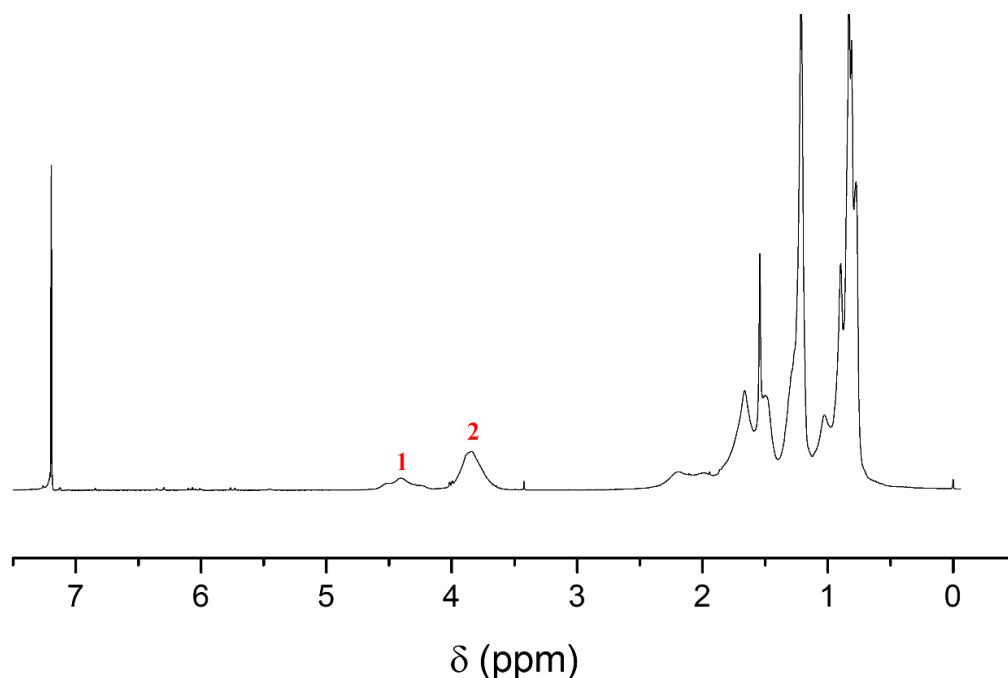

**Figure S1.**  $^1\text{H}$  NMR spectra of the copolymer poly(2-ethylhexyl acrylate-co-isobornyl methacrylate) after purification. The chemical shifts identified with numbers 1 and 2 (in red), at 4.40 and 3.84 ppm, are assigned to the hydrogen of the ortho-carbon of the isobornyl methacrylate's ring and to the two hydrogens of the methylene group linked to the oxygen of the ester group of 2-ethylhexyl acrylate, respectively.
